# Supplementary material for: Novel candidate genes important for asthma and hypertension comorbidity revealed from associative gene networks
Source: BMC Med Genomics. 2018 Feb 13;11(Suppl 1):15. doi: 10.1186/s12920-018-0331-4 (PMC6389037; doi:10.1186/s12920-018-0331-4)
Supplement: Supplementary file 6 — Criteria 4 and 5 results. (XLSX 36 kb) [file 12920_2018_331_MOESM6_ESM.xlsx]

## Sheet: common network
Rank	GeneID	Symbol	Degree centrality (DC)	Closeness centrality (CC)	Betweenness centrality (BC)	Sum of DC, CC, BC	Average of DC, CC, BC
1	3569	IL6	0.701754	0.764075	0.0429029	1.50873	0.502911
2	7124	TNF	0.680702	0.755968	0.0343415	1.47101	0.490337
3	3553	IL1B	0.6	0.710723	0.0245577	1.33528	0.445094
4	3630	INS	0.596491	0.707196	0.0235381	1.32723	0.442408
5	4790	NFKB1	0.568421	0.695122	0.0215822	1.28513	0.428375
6	7422	VEGFA	0.550877	0.685096	0.0166281	1.2526	0.417534
7	7157	TP53	0.533333	0.670588	0.0275853	1.23151	0.410502
8	7040	TGFB1	0.526316	0.673759	0.0194888	1.21956	0.406521
9	1401	CRP	0.512281	0.664336	0.0334087	1.21003	0.403342
10	3664	IRF6	0.519298	0.667447	0.015306	1.20205	0.400684
11	3458	IFNG	0.515789	0.662791	0.0115019	1.19008	0.396694
12	213	ALB	0.487719	0.655172	0.0118739	1.15477	0.384922
13	2099	ESR1	0.480702	0.652174	0.0190531	1.15193	0.383976
14	3586	IL10	0.480702	0.650685	0.0111439	1.14253	0.380844
15	3952	LEP	0.466667	0.644796	0.00745677	1.11892	0.372973
16	1956	EGFR	0.449123	0.639013	0.0146201	1.10276	0.367585
17	3565	IL4	0.452632	0.640449	0.00841098	1.10149	0.367164
18	2353	FOS	0.449123	0.637584	0.00993127	1.09664	0.365546
19	4318	MMP9	0.445614	0.634744	0.00559356	1.08595	0.361984
20	207	AKT1	0.424561	0.626374	0.00645451	1.05739	0.352463
21	9370	ADIPOQ	0.421053	0.625	0.00880323	1.05486	0.351619
22	4843	NOS2	0.421053	0.625	0.00571934	1.05177	0.350591
23	3576	CXCL8	0.414035	0.626374	0.00775753	1.04817	0.349389
24	5743	PTGS2	0.414035	0.627753	0.00559173	1.04738	0.349127
25	596	BCL2	0.403509	0.618221	0.00486076	1.02659	0.342197
26	4313	MMP2	0.4	0.616883	0.00532479	1.02221	0.340736
27	3558	IL2	0.389474	0.611588	0.00619375	1.00726	0.335752
28	2335	FN1	0.375439	0.611588	0.00800394	0.995031	0.331677
29	6647	SOD1	0.378947	0.606383	0.00530024	0.990631	0.33021
30	3383	ICAM1	0.375439	0.607676	0.00549239	0.988607	0.329536
31	847	CAT	0.364912	0.606383	0.00634849	0.977644	0.325881
32	1906	EDN1	0.364912	0.601266	0.00433297	0.970511	0.323504
33	3479	IGF1	0.361404	0.602537	0.00601841	0.969959	0.32332
34	4312	MMP1	0.34386	0.597484	0.00724658	0.948591	0.316197
35	6347	CCL2	0.34386	0.59375	0.00222207	0.939832	0.313277
36	5327	PLAT	0.336842	0.59375	0.00583432	0.936426	0.312142
37	6648	SOD2	0.336842	0.591286	0.00445756	0.932586	0.310862
38	5054	SERPINE1	0.329825	0.59375	0.00482782	0.928402	0.309467
39	5970	RELA	0.329825	0.59375	0.00385999	0.927435	0.309145
40	5617	PRL	0.329825	0.591286	0.00322163	0.924333	0.308111
41	367	AR	0.319298	0.58642	0.00957805	0.915296	0.305099
42	920	CD4	0.315789	0.590062	0.00484052	0.910692	0.303564
43	7099	TLR4	0.319298	0.587629	0.00266041	0.909588	0.303196
44	6696	SPP1	0.312281	0.588843	0.00179364	0.902917	0.300972
45	51477	ISYNA1	0.312281	0.585216	0.0015883	0.899085	0.299695
46	3606	IL18	0.308772	0.581633	0.00236479	0.892769	0.29759
47	5468	PPARG	0.305263	0.582822	0.00323514	0.89132	0.297107
48	1371	CPOX	0.298246	0.581633	0.00381883	0.883697	0.294566
49	348	APOE	0.294737	0.581633	0.00372911	0.880099	0.293366
50	354	KLK3	0.294737	0.579268	0.00533665	0.879342	0.293114
51	3162	HMOX1	0.287719	0.579268	0.00216215	0.86915	0.289717
52	1351	COX8A	0.284211	0.578093	0.00413006	0.866434	0.288811
53	9377	COX5A	0.280702	0.575758	0.00323871	0.859698	0.286566
54	5542	PRB1	0.280702	0.573441	0.0049924	0.859135	0.286378
55	958	CD40	0.280702	0.575758	0.00226537	0.858725	0.286242
56	3557	IL1RN	0.280702	0.572289	0.00193699	0.854928	0.284976
57	3082	HGF	0.277193	0.572289	0.00349094	0.852973	0.284324
58	7412	VCAM1	0.277193	0.572289	0.00114752	0.85063	0.283543
59	5443	POMC	0.273684	0.57	0.00422451	0.847909	0.282636
60	339345	NANOS2	0.273684	0.572289	0.00148668	0.84746	0.282487
61	7076	TIMP1	0.273684	0.571142	0.00205675	0.846883	0.282294
62	1465	CSRP1	0.273684	0.567729	0.00265902	0.844072	0.281357
63	2908	NR3C1	0.270175	0.57	0.00386788	0.844043	0.281348
64	133	ADM	0.266667	0.5666	0.00329277	0.83656	0.278853
65	627	BDNF	0.263158	0.564356	0.00363917	0.831153	0.277051
66	3308	HSPA4	0.259649	0.567729	0.00245266	0.829831	0.27661
67	6098	ROS1	0.259649	0.565476	0.00277087	0.827896	0.275965
68	4846	NOS3	0.25614	0.563241	0.0022594	0.821641	0.27388
69	1636	ACE	0.252632	0.564356	0.00426646	0.821254	0.273751
70	372	ARCN1	0.252632	0.56213	0.0044079	0.81917	0.273057
71	283	ANG	0.245614	0.558824	0.00615382	0.810591	0.270197
72	5728	PTEN	0.235088	0.558824	0.00166341	0.795575	0.265192
73	5241	PGR	0.231579	0.552326	0.00170408	0.785609	0.26187
74	3567	IL5	0.221053	0.553398	0.00256083	0.777012	0.259004
75	56729	RETN	0.221053	0.554475	0.00111149	0.776639	0.25888
76	335	APOA1	0.217544	0.552326	0.00492208	0.774792	0.258264
77	72	ACTG2	0.224561	0.545977	0.00263305	0.773171	0.257724
78	356	FASLG	0.217544	0.549133	0.000895898	0.767573	0.255858
79	1392	CRH	0.210526	0.549133	0.00118535	0.760845	0.253615
80	59067	IL21	0.214035	0.544933	0.000689526	0.759658	0.253219
81	7504	XK	0.207018	0.547025	0.00129926	0.755342	0.251781
82	8743	TNFSF10	0.207018	0.547025	0.00071174	0.754754	0.251585
83	4353	MPO	0.203509	0.543893	0.00152352	0.748925	0.249642
84	7291	TWIST1	0.2	0.547025	0.000938387	0.747963	0.249321
85	5555	PRH2	0.196491	0.547025	0.00100904	0.744525	0.248175
86	5554	PRH1	0.196491	0.547025	0.00100904	0.744525	0.248175
87	196	AHR	0.185965	0.543893	0.00881938	0.738677	0.246226
88	8856	NR1I2	0.189474	0.545977	0.00183607	0.737287	0.245762
89	1490	CTGF	0.189474	0.542857	0.00104708	0.733378	0.244459
90	7054	TH	0.189474	0.540797	0.00145625	0.731727	0.243909
91	973	CD79A	0.182456	0.541825	0.00183225	0.726113	0.242038
92	7432	VIP	0.185965	0.536723	0.000580025	0.723268	0.241089
93	4137	MAPT	0.182456	0.536723	0.00255531	0.721735	0.240578
94	11202	KLK8	0.178947	0.533708	0.00158187	0.714237	0.238079
95	7450	VWF	0.175439	0.537736	0.00105387	0.714228	0.238076
96	4860	PNP	0.175439	0.535714	0.000748265	0.711901	0.2373
97	801	CALM1	0.168421	0.53271	0.00322433	0.704356	0.234785
98	805	CALM2	0.168421	0.53271	0.00322433	0.704356	0.234785
99	808	CALM3	0.168421	0.53271	0.00322433	0.704356	0.234785
100	2	A2M	0.164912	0.535714	0.00110074	0.701727	0.233909
101	3925	STMN1	0.164912	0.535714	0.000789594	0.701416	0.233805
102	6490	PMEL	0.164912	0.530726	0.000376655	0.696015	0.232005
103	2729	GCLC	0.164912	0.52974	0.00117788	0.69583	0.231943
104	7098	TLR3	0.161404	0.533708	0.000234874	0.695346	0.231782
105	6401	SELE	0.161404	0.52974	0.000714425	0.691858	0.230619
106	4153	MBL2	0.157895	0.52974	0.00309476	0.690729	0.230243
107	171017	ZNF384	0.161404	0.528757	0.00054246	0.690703	0.230234
108	9734	HDAC9	0.147368	0.52974	0.00125399	0.678362	0.226121
109	55729	ATF7IP	0.150877	0.52583	0.0010463	0.677754	0.225918
110	4852	NPY	0.150877	0.524862	0.000620953	0.67636	0.225453
111	114548	NLRP3	0.150877	0.520073	0.000568324	0.671519	0.22384
112	2876	GPX1	0.14386	0.52583	0.0011442	0.670834	0.223611
113	717	C2	0.147368	0.521978	0.000641795	0.669988	0.223329
114	6741	SSB	0.150877	0.516304	0.00155457	0.668736	0.222912
115	5265	SERPINA1	0.136842	0.523897	0.00207424	0.662813	0.220938
116	2993	GYPA	0.136842	0.523897	0.00104684	0.661786	0.220595
117	1471	CST3	0.133333	0.521978	0.000225171	0.655537	0.218512
118	768	CA9	0.133333	0.521024	0.00067536	0.655032	0.218344
119	9242	MSC	0.126316	0.521978	0.000371889	0.648666	0.216222
120	3240	HP	0.126316	0.515371	0.000393016	0.64208	0.214027
121	1431	CS	0.122807	0.517241	0.000505497	0.640554	0.213518
122	6356	CCL11	0.126316	0.51259	0.000159989	0.639066	0.213022
123	2641	GCG	0.126316	0.509839	0.000291641	0.636446	0.212149
124	551	AVP	0.115789	0.515371	0.000360643	0.631521	0.210507
125	7052	TGM2	0.115789	0.513514	0.0002028	0.629506	0.209835
126	7306	TYRP1	0.119298	0.508929	0.000614795	0.628842	0.209614
127	5045	FURIN	0.115789	0.510753	0.0021371	0.628679	0.20956
128	8288	EPX	0.112281	0.515371	0.000641775	0.628293	0.209431
129	6532	SLC6A4	0.115789	0.51167	0.000359601	0.627819	0.209273
130	1113	CHGA	0.112281	0.51259	0.000266404	0.625137	0.208379
131	10592	SMC2	0.112281	0.508929	4.20607e-05	0.621251	0.207084
132	55034	MOCOS	0.105263	0.513514	0.000149401	0.618926	0.206309
133	4139	MARK1	0.105263	0.51259	0.000292713	0.618146	0.206049
134	6402	SELL	0.105263	0.51259	0.00010486	0.617958	0.205986
135	373156	GSTK1	0.105263	0.51167	0.000480676	0.617413	0.205804
136	133482	SLCO6A1	0.105263	0.51167	0.000480676	0.617413	0.205804
137	5132	PDC	0.105263	0.51167	0.000268446	0.617201	0.205734
138	140738	TMEM37	0.105263	0.508021	0.000399474	0.613684	0.204561
139	5730	PTGDS	0.101754	0.509839	0.000192153	0.611786	0.203929
140	6590	SLPI	0.101754	0.507117	0.000103951	0.608976	0.202992
141	1803	DPP4	0.0982456	0.506217	0.000148246	0.604611	0.201537
142	10911	UTS2	0.0982456	0.5	0.000236866	0.598482	0.199494
143	4524	MTHFR	0.101754	0.496516	0.000180014	0.59845	0.199483
144	2950	GSTP1	0.0982456	0.494792	0.000702276	0.59374	0.197913
145	5478	PPIA	0.0877193	0.494792	0.000143149	0.582654	0.194218
146	5069	PAPPA	0.0877193	0.49308	0.000163008	0.580962	0.193654
147	10850	CCL27	0.0807018	0.497382	4.15238e-05	0.578125	0.192708
148	30009	TBX21	0.0807018	0.497382	3.91907e-05	0.578123	0.192708
149	410	ARSA	0.077193	0.5	5.66838e-05	0.57725	0.192417
150	1728	NQO1	0.0701754	0.495652	0.000190633	0.566018	0.188673
151	889	KRIT1	0.0736842	0.491379	0.000248222	0.565312	0.188437
152	4547	MTTP	0.0666667	0.493934	0.000827579	0.561428	0.187143
153	55835	CENPJ	0.0631579	0.497382	0.000810297	0.56135	0.187117
154	259	AMBP	0.0736842	0.478992	0.00753781	0.560214	0.186738
155	2961	GTF2E2	0.0736842	0.48552	0.000343812	0.559548	0.186516
156	2960	GTF2E1	0.0736842	0.48552	0.000343812	0.559548	0.186516
157	4184	SMCP	0.0666667	0.492228	2.86406e-05	0.558923	0.186308
158	217	ALDH2	0.0561404	0.495652	0.00708082	0.558873	0.186291
159	5199	CFP	0.0666667	0.490534	0.000102385	0.557303	0.185768
160	2952	GSTT1	0.0701754	0.483871	0.000224714	0.554271	0.184757
161	3953	LEPR	0.0596491	0.491379	8.26801e-06	0.551037	0.183679
162	79823	CAMKMT	0.0666667	0.478188	0.0001888	0.545043	0.181681
163	22900	CARD8	0.0526316	0.492228	0.000122603	0.544982	0.181661
164	1909	EDNRA	0.0561404	0.48552	0.000125762	0.541786	0.180595
165	54741	LEPROT	0.0526316	0.487179	3.7645e-06	0.539815	0.179938
166	154	ADRB2	0.0526316	0.476589	0.00745175	0.536672	0.178891
167	2028	ENPEP	0.0561404	0.478992	0.000188566	0.535321	0.17844
168	2117	ETV3	0.0491228	0.482234	7.8373e-05	0.531435	0.177145
169	189	AGXT	0.045614	0.484694	6.91594e-05	0.530377	0.176792
170	10628	TXNIP	0.0491228	0.480607	1.25402e-05	0.529742	0.176581
171	3291	HSD11B2	0.0561404	0.472637	3.91516e-05	0.528816	0.176272
172	10899	JTB	0.0526316	0.473422	2.00934e-05	0.526074	0.175358
173	3816	KLK1	0.0561404	0.46875	0.000121982	0.525012	0.175004
174	7035	TFPI	0.045614	0.478992	1.17932e-05	0.524617	0.174872
175	1831	TSC22D3	0.0421053	0.476589	7.60387e-05	0.51877	0.172923
176	5901	RAN	0.0491228	0.466448	0.000161378	0.515733	0.171911
177	5172	SLC26A4	0.0421053	0.472637	2.80095e-05	0.51477	0.17159
178	28	ABO	0.0491228	0.461165	4.16818e-05	0.51033	0.17011
179	1557	CYP2C19	0.0421053	0.457464	0.00011494	0.499684	0.166561
180	7222	TRPC3	0.0385965	0.46042	2.67594e-05	0.499043	0.166348
181	1544	CYP1A2	0.0421053	0.456	0.000138794	0.498244	0.166081
182	1993	ELAVL2	0.0315789	0.465686	7.85408e-05	0.497344	0.165781
183	26	AOC1	0.0280702	0.46875	7.79662e-05	0.496898	0.165633
184	2242	FES	0.0315789	0.46042	0.000136299	0.492135	0.164045
185	501	ALDH7A1	0.0385965	0.451664	2.58624e-05	0.490286	0.163429
186	5921	RASA1	0.0245614	0.462662	4.66304e-05	0.48727	0.162423
187	151	ADRA2B	0.0175439	0.469522	2.12577e-05	0.487087	0.162362
188	9063	PIAS2	0.0280702	0.458937	7.83961e-05	0.487086	0.162362
189	3818	KLKB1	0.0280702	0.458199	7.06769e-05	0.48634	0.162113
190	51517	NCKIPSD	0.0280702	0.453822	5.47836e-05	0.481947	0.160649
191	2245	FGD1	0.0350877	0.445312	0.000121577	0.480522	0.160174
192	1652	DDT	0.0210526	0.456731	0	0.477783	0.159261
193	4810	NHS	0.0210526	0.452381	2.46101e-05	0.473458	0.157819
194	6915	TBXA2R	0.0315789	0.432473	1.08827e-05	0.464063	0.154688
195	4360	MRC1	0.00701754	0.448113	0	0.455131	0.15171
196	5338	PLD2	0.0210526	0.429864	3.69456e-06	0.450921	0.150307
197	1573	CYP2J2	0.0175439	0.429864	1.97994e-06	0.44741	0.149137
198	7373	COL14A1	0.0140351	0.416667	2.24633e-06	0.430704	0.143568
199	5997	RGS2	0.0245614	0.40483	0.000126701	0.429518	0.143173
200	23152	CIC	0.0140351	0.414847	1.05426e-05	0.428893	0.142964
201	9445	ITM2B	0.0140351	0.409483	3.63474e-06	0.423521	0.141174
202	10960	LMAN2	0.0105263	0.408895	2.64488e-06	0.419424	0.139808
203	3779	KCNMB1	0.0105263	0.353598	0	0.364124	0.121375
204	57380	MRS2	0.00701754	0.356696	0	0.363713	0.121238
205	23151	GRAMD4	0.00350877	0.324232	0	0.327741	0.109247

## Sheet: genetic regulatory network
Rank	GeneID	Symbol	Degree centrality (DC)	Closeness centrality (CC)	Betweenness centrality (BC)	Sum of DC, CC, BC	Average of DC, CC, BC
1	7412	VCAM1	0.201681	0.447154	0.204644	0.85348	0.284493
2	7124	TNF	0.142857	0.423077	0.173093	0.739027	0.246342
3	3383	ICAM1	0.12605	0.42471	0.0845687	0.63533	0.211777
4	1490	CTGF	0.109244	0.392857	0.0854112	0.587512	0.195837
5	3458	IFNG	0.109244	0.37931	0.0711533	0.559707	0.186569
6	3553	IL1B	0.10084	0.371622	0.0845155	0.556977	0.185659
7	7040	TGFB1	0.0840336	0.378007	0.0812285	0.543269	0.18109
8	3569	IL6	0.0840336	0.371622	0.0831325	0.538788	0.179596
9	5054	SERPINE1	0.0840336	0.369128	0.0844272	0.537588	0.179196
10	3664	IRF6	0.0840336	0.372881	0.069166	0.526081	0.17536
11	3952	LEP	0.0756303	0.371622	0.0521414	0.499393	0.166464
12	3630	INS	0.0756303	0.365449	0.0516955	0.492774	0.164258
13	4313	MMP2	0.0840336	0.332326	0.0561715	0.472531	0.15751
14	4846	NOS3	0.0756303	0.33033	0.0562563	0.462217	0.154072
15	30009	TBX21	0.0672269	0.336391	0.05534	0.458958	0.152986
16	4790	NFKB1	0.0672269	0.34375	0.0412274	0.452204	0.150735
17	3953	LEPR	0.0588235	0.327381	0.0654723	0.451677	0.150559
18	9370	ADIPOQ	0.0588235	0.348101	0.0303774	0.437302	0.145767
19	56729	RETN	0.0504202	0.340557	0.0250229	0.416	0.138667
20	207	AKT1	0.0504202	0.340557	0.022021	0.412998	0.137666
21	133	ADM	0.0420168	0.354839	0.0155759	0.412431	0.137477
22	1401	CRP	0.0336134	0.336391	0.0139232	0.383928	0.127976
23	7422	VEGFA	0.0336134	0.334347	0.0150641	0.383024	0.127675
24	3558	IL2	0.0420168	0.33033	0.00918265	0.38153	0.127177
25	2353	FOS	0.0336134	0.326409	0.00703848	0.367061	0.122354
26	3586	IL10	0.0336134	0.322581	0.00745656	0.363651	0.121217
27	3082	HGF	0.0252101	0.332326	0.00383209	0.361368	0.120456
28	596	BCL2	0.0336134	0.3207	0.00650082	0.360814	0.120271
29	3479	IGF1	0.0336134	0.31339	0.0108416	0.357845	0.119282
30	6696	SPP1	0.0252101	0.318841	0.00373533	0.347786	0.115929
31	7076	TIMP1	0.0252101	0.318841	0.00373533	0.347786	0.115929
32	3565	IL4	0.0252101	0.319767	0.00218235	0.34716	0.11572
33	7052	TGM2	0.0252101	0.318841	0.0023261	0.346377	0.115459
34	1465	CSRP1	0.0168067	0.318841	0.00256404	0.338211	0.112737
35	5555	PRH2	0.0168067	0.317919	0.00145859	0.336184	0.112061
36	3567	IL5	0.0336134	0.294906	0.00567862	0.334198	0.111399
37	1956	EGFR	0.0252101	0.303867	0.00300586	0.332083	0.110694
38	5617	PRL	0.0252101	0.299728	0.00441112	0.329349	0.109783
39	6347	CCL2	0.0168067	0.309859	0.00116855	0.327834	0.109278
40	958	CD40	0.0168067	0.310734	0	0.327541	0.10918
41	5468	PPARG	0.0252101	0.296496	0.00314963	0.324856	0.108285
42	9734	HDAC9	0.0168067	0.272953	0.0307648	0.320524	0.106841
43	7504	XK	0.00840336	0.309859	0	0.318263	0.106088
44	7157	TP53	0.0168067	0.290237	0.000631255	0.307675	0.102558
45	3606	IL18	0.0168067	0.273632	0.0155249	0.305963	0.101988
46	335	APOA1	0.0168067	0.287958	0.000998119	0.305763	0.101921
47	5743	PTGS2	0.0168067	0.279898	0.000919574	0.297625	0.0992082
48	6356	CCL11	0.0168067	0.279188	0.000755965	0.296751	0.0989168
49	5728	PTEN	0.0168067	0.276382	0.000214192	0.293403	0.0978009
50	1909	EDNRA	0.00840336	0.282776	0	0.29118	0.0970599
51	7291	TWIST1	0.00840336	0.282776	0	0.29118	0.0970599
52	72	ACTG2	0.0252101	0.249433	0.0153112	0.289954	0.0966515
53	5443	POMC	0.0252101	0.249433	0.0153112	0.289954	0.0966515
54	283	ANG	0.00840336	0.272277	0	0.280681	0.0935602
55	3557	IL1RN	0.00840336	0.272277	0	0.280681	0.0935602
56	1557	CYP2C19	0.00840336	0.271605	0	0.280008	0.0933361
57	3240	HP	0.00840336	0.271605	0	0.280008	0.0933361
58	4852	NPY	0.00840336	0.271605	0	0.280008	0.0933361
59	213	ALB	0.00840336	0.27027	0	0.278674	0.0928912
60	5241	PGR	0.0168067	0.25522	0.00113034	0.273157	0.0910525
61	1728	NQO1	0.00840336	0.261905	0	0.270308	0.0901027
62	3162	HMOX1	0.00840336	0.261905	0	0.270308	0.0901027
63	4353	MPO	0.00840336	0.261905	0	0.270308	0.0901027
64	2729	GCLC	0.00840336	0.252294	0	0.260697	0.086899
65	7432	VIP	0.00840336	0.252294	0	0.260697	0.086899
66	59067	IL21	0.00840336	0.252294	0	0.260697	0.086899
67	2335	FN1	0.00840336	0.25	0	0.258403	0.0861345
68	10899	JTB	0.00840336	0.25	0	0.258403	0.0861345
69	4843	NOS2	0.00840336	0.248869	0	0.257272	0.0857574
70	51477	ISYNA1	0.00840336	0.248869	0	0.257272	0.0857574
71	847	CAT	0.00840336	0.244444	0	0.252848	0.0842826
72	4318	MMP9	0.00840336	0.244444	0	0.252848	0.0842826
73	6647	SOD1	0.00840336	0.244444	0	0.252848	0.0842826
74	6648	SOD2	0.00840336	0.244444	0	0.252848	0.0842826
75	1906	EDN1	0.00840336	0.242826	0	0.251229	0.083743
76	8288	EPX	0.00840336	0.242826	0	0.251229	0.083743
77	6098	ROS1	0.00840336	0.2407	0	0.249104	0.0830345
78	1544	CYP1A2	0.0168067	0.215686	0.0155249	0.248018	0.0826726
79	2908	NR3C1	0.00840336	0.236052	0	0.244455	0.081485
80	5554	PRH1	0.00840336	0.225873	0	0.234276	0.078092
81	140738	TMEM37	0.00840336	0.225873	0	0.234276	0.078092
82	1392	CRH	0.00840336	0.215264	0	0.223668	0.0745558
83	133482	SLCO6A1	0.0168067	0.20073	4.74766e-05	0.217584	0.072528
84	373156	GSTK1	0.0168067	0.20073	4.74766e-05	0.217584	0.072528
85	196	AHR	0.00840336	0.177706	0	0.186109	0.0620364
86	367	AR	0.00840336	0	0	0.00840336	0.00280112
87	551	AVP	0.00840336	0	0	0.00840336	0.00280112
88	5045	FURIN	0.00840336	0	0	0.00840336	0.00280112
89	5327	PLAT	0.00840336	0	0	0.00840336	0.00280112
90	6490	PMEL	0.00840336	0	0	0.00840336	0.00280112
91	8856	NR1I2	0.00840336	0	0	0.00840336	0.00280112
92	2	A2M
92	26	AOC1
92	28	ABO
92	151	ADRA2B
92	154	ADRB2
92	189	AGXT
92	217	ALDH2
92	259	AMBP
92	348	APOE
92	354	KLK3
92	356	FASLG
92	372	ARCN1
92	410	ARSA
92	501	ALDH7A1
92	627	BDNF
92	717	C2
92	768	CA9
92	801	CALM1
92	805	CALM2
92	808	CALM3
92	889	KRIT1
92	920	CD4
92	973	CD79A
92	1113	CHGA
92	1351	COX8A
92	1371	CPOX
92	1431	CS
92	1471	CST3
92	1573	CYP2J2
92	1636	ACE
92	1652	DDT
92	1803	DPP4
92	1831	TSC22D3
92	1993	ELAVL2
92	2028	ENPEP
92	2099	ESR1
92	2117	ETV3
92	2242	FES
92	2245	FGD1
92	2641	GCG
92	2876	GPX1
92	2950	GSTP1
92	2952	GSTT1
92	2960	GTF2E1
92	2961	GTF2E2
92	2993	GYPA
92	3291	HSD11B2
92	3308	HSPA4
92	3576	CXCL8
92	3779	KCNMB1
92	3816	KLK1
92	3818	KLKB1
92	3925	STMN1
92	4137	MAPT
92	4139	MARK1
92	4153	MBL2
92	4184	SMCP
92	4312	MMP1
92	4360	MRC1
92	4524	MTHFR
92	4547	MTTP
92	4810	NHS
92	4860	PNP
92	5069	PAPPA
92	5132	PDC
92	5172	SLC26A4
92	5199	CFP
92	5265	SERPINA1
92	5338	PLD2
92	5478	PPIA
92	5542	PRB1
92	5730	PTGDS
92	5901	RAN
92	5921	RASA1
92	5970	RELA
92	5997	RGS2
92	6401	SELE
92	6402	SELL
92	6532	SLC6A4
92	6590	SLPI
92	6741	SSB
92	6915	TBXA2R
92	7035	TFPI
92	7054	TH
92	7098	TLR3
92	7099	TLR4
92	7222	TRPC3
92	7306	TYRP1
92	7373	COL14A1
92	7450	VWF
92	8743	TNFSF10
92	9063	PIAS2
92	9242	MSC
92	9377	COX5A
92	9445	ITM2B
92	10592	SMC2
92	10628	TXNIP
92	10850	CCL27
92	10911	UTS2
92	10960	LMAN2
92	11202	KLK8
92	22900	CARD8
92	23151	GRAMD4
92	23152	CIC
92	51517	NCKIPSD
92	54741	LEPROT
92	55034	MOCOS
92	55729	ATF7IP
92	55835	CENPJ
92	57380	MRS2
92	79823	CAMKMT
92	114548	NLRP3
92	171017	ZNF384
92	339345	NANOS2
